# Supplementary material
Source: PubMed Central journal article supplement (PMC6990375)
Supplement: mmc1.pdf [file mmc1.pdf]

**Biophysical Journal, Volume 117**

**Supplemental Information**

**Microstructurally Motivated Constitutive Modeling of Heart Failure  
Mechanics**

**Abdallah I. Hasaballa, Vicky Y. Wang, Gregory B. Sands, Alexander J. Wilson, Alistair A. Young, Ian J. LeGrice, and Martyn P. Nash**

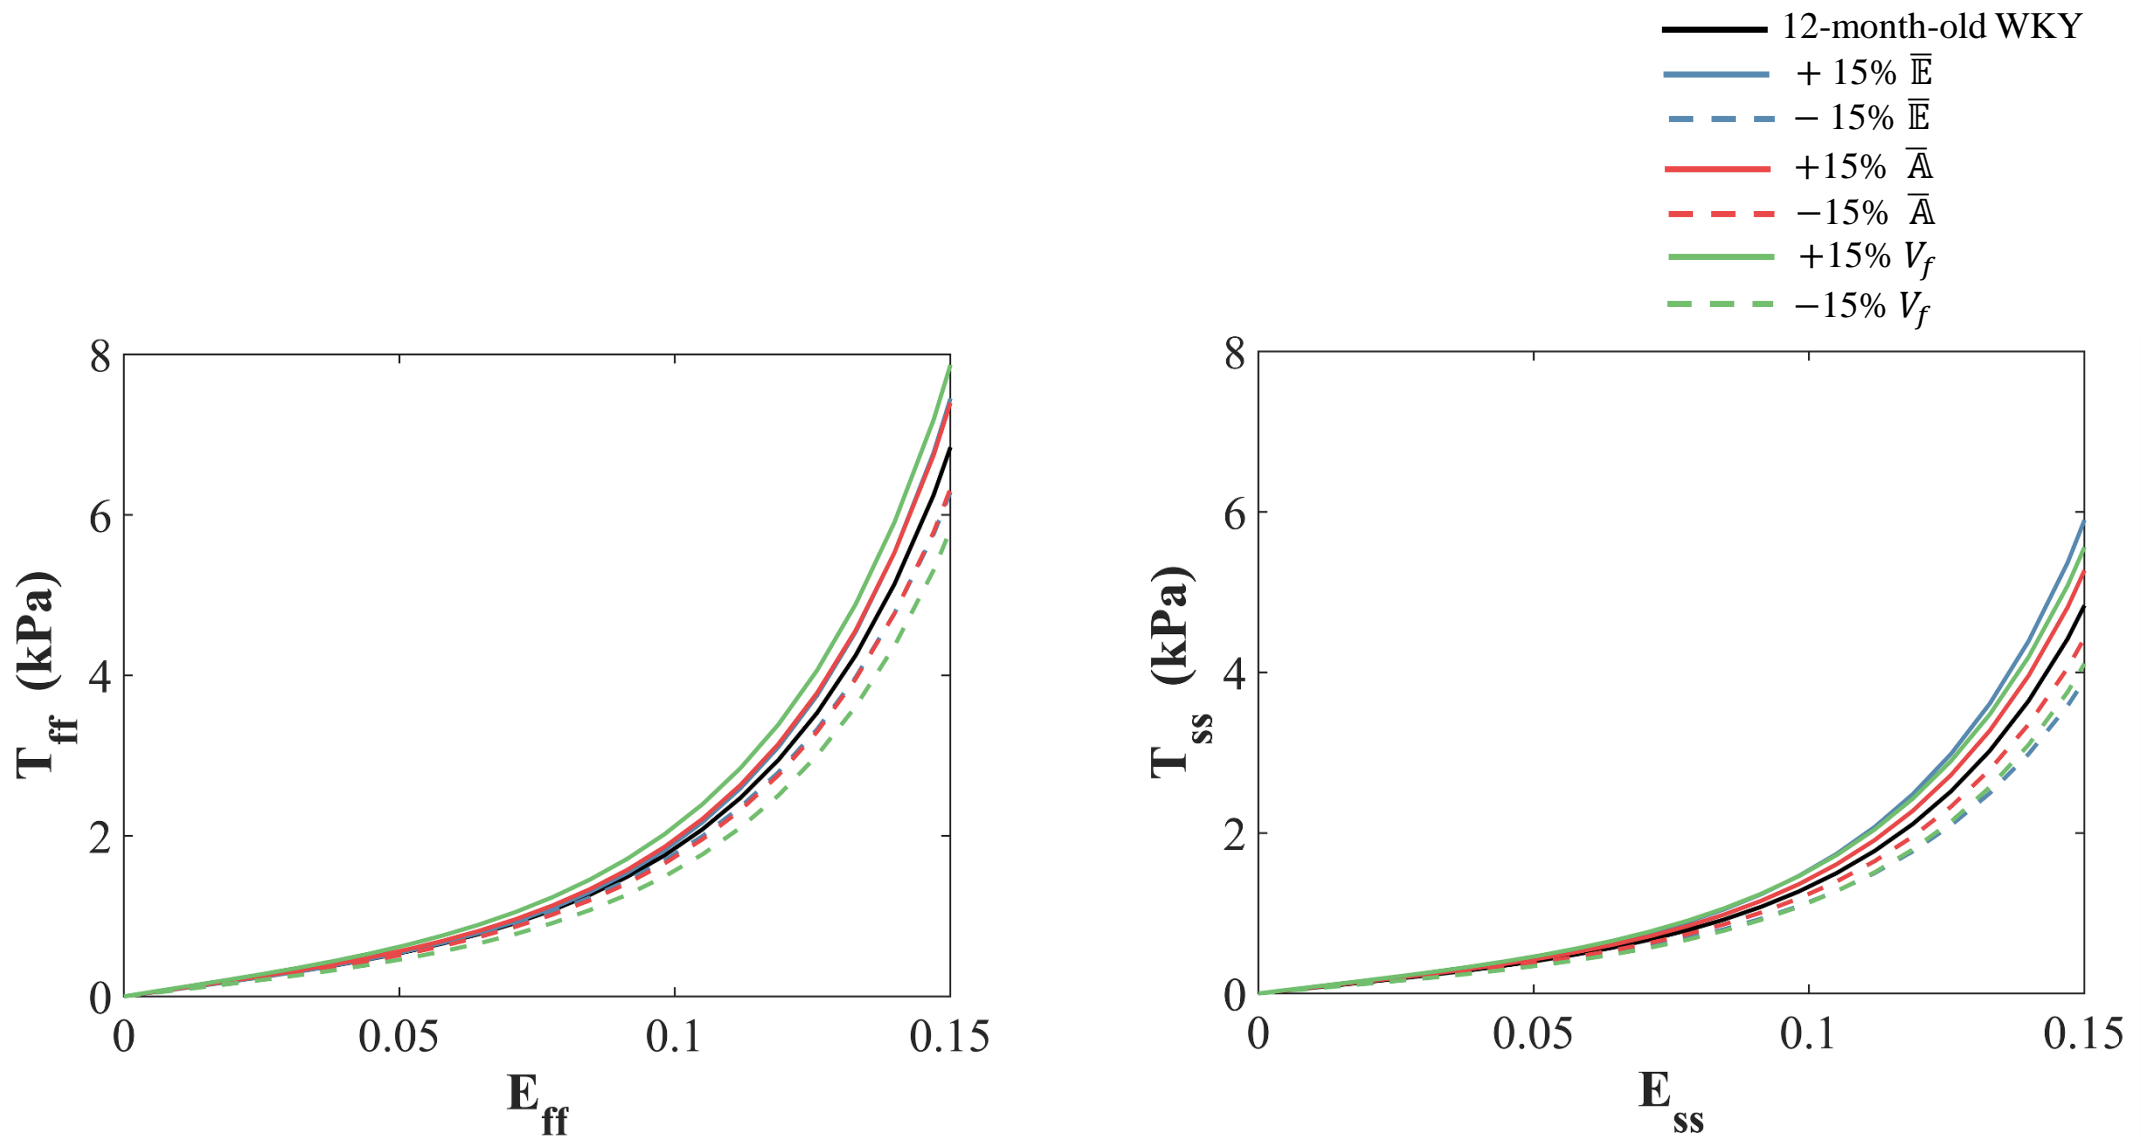

**Fig.S1:** Influence of the structural parameters on the mechanical behavior of the constitutive model as expressed by stress-strain curves in myofiber (*left*) and sheetlet (*right*) directions for 12-month-old WKY (*solid black line*). The analysis was carried out by changing each of the structural parameters:  $\bar{E}$  (*blue*),  $\bar{A}$  (*red*) and  $V_f$  (*green*) by +15% (*solid lines*) and -15% (*dash lines*), taking one parameter at a time while keeping the remaining parameters unchanged.
